# Supplementary material
Source: publisher figshare collection journal article supplement (https://frontiersin.figshare.com/ndownloader/files/25321550)
Supplement: Supplementary file 1 [file 25321550]

Supplementary Table 3. Density medians (sea cucumbers/100 m2) of *I. fuscus* for year and monitoring zone and area (km2) calculated for each monitoring zone. *Average of previous year's density value with the following year's density.

|  | **Monitoring zone** | | | | |
| --- | --- | --- | --- | --- | --- |
| **Year** | **Western** | **Elizabeth** | **Central-SE Santa Cruz-Floreana** | **Central-SE San Cristóbal** | **Central-SE Española** |
| 2000 | 20 | 73.5 | 5 | 3 | 8 |
| 2001 | 88 | 58.5 | 5 | 3 | 6.5 |
| 2002 | 38 | 38.5 | 5 | 3 | 12.5 |
| 2003 | 28.5 | 28 | 5 | 3 | 5 |
| 2004 | 4 | 7 | 5 | 3 | 4 |
| 2005 | 6 | 8 | 5 | 3 | 3 |
| 2006 | 6 | 8 | 5 | 1 | 3 |
| 2007 | 8 | 13.5 | 5 | 6.5 | 10 |
| 2008 | 12 | 12.5 | 5 | 0.5 | 0 |
| 2009 | 1 | 2 | 5 | 3 | 4 |
| 2010 | 7 | 10 | 4 | 3 | 3 |
| 2011 | 5 | 12.5 | 5 | 5 | 8 |
| 2012 | 7 | 4 | 5 | 5.3* | 7.3* |
| 2013 | 7 | 7 | 5 | 5.5 | 6.5 |
| 2014 | 10 | 8* | 5 | 4 | 6 |
| 2015 | 6 | 9 | 5 | 4 | 5.5 |
| 2016 | 5.5 | 2 | 4 | 4 | 5 |
| 2017 | 3 | 3 | 5 | 5 | 6 |
| 2018 | 7 | 6 | 4 | 7 | 6.5 |
| 2019 | 5 | 5 | 5 | 6 | 9 |
| **Area** | 102.4 | 41.2 | 38.6 | 81.4 | 8.5 |
